# Supplementary material
Source: PubMed Central journal article supplement (PMC2997312)
Supplement: bcp0070-0721-SD1.pdf [file bcp0070-0721-SD1.pdf]

**Table S1**

ROR for hepatic injury of individual drugs ranked according to the strength of the crude association in the population &lt;18 years old

| Drug                            | Number of cases | Number of non-cases | ROR (95% CI)       |                        |                        |
|---------------------------------|-----------------|---------------------|--------------------|------------------------|------------------------|
|                                 |                 |                     | Crude              | With vaccines          | Without vaccines       |
|                                 |                 |                     |                    | Number of cases = 6595 | Number of cases = 6147 |
|                                 |                 |                     | Adjusted*          | Adjusted*              |                        |
| Oxymetholone                    | 4               | 4                   | 93.8 (48.6, 180.9) | 40.4 (9.2, 178.4)      | 39.0 (8.0, 190.2)      |
| Norethisterone/ethinylestradiol | 5               | 6                   | 78.2 (43.2, 141.4) | 31.6 (9.4, 106.2)      | 24.9 (7.6, 82.0)       |
| Milrinone                       | 4               | 9                   | 41.7 (20.7, 83.7)  | 28.2 (8.3, 95.6)       | 15.6 (4.7, 52.0)       |
| Retinol                         | 11              | 27                  | 38.2 (25.0, 58.5)  | 53.7 (26.2, 110.2)     | 15.5 (7.6, 31.6)       |
| Atazanavir                      | 17              | 44                  | 36.3 (25.7, 51.2)  | 33.6 (18.4, 61.4)      | 16.9 (9.6, 29.8)       |
| Pemoline†                       | 104             | 282                 | 35.1 (30.5, 40.4)  | 31.6 (25.0, 40.0)      | 14.4 (11.5, 18.2)      |
| Pyrazinamide                    | 17              | 47                  | 34.0 (24.0, 48.0)  | 17.0 (9.4, 30.5)       | 17.8 (9.9, 32.0)       |
| Isoniazid                       | 47              | 140                 | 31.7 (25.7, 39.1)  | 23.5 (16.6, 33.4)      | 14.0 (9.9, 19.7)       |
| Naltrexone                      | 7               | 22                  | 29.9 (17.3, 51.6)  | 12.8 (5.3, 31.1)       | 8.6 (3.6, 20.2)        |
| Troglitazone†                   | 10              | 32                  | 29.3 (18.5, 46.4)  | 23.5 (11.1, 49.6)      | 11.3 (5.5, 23.3)       |
| Sulthiame                       | 8               | 27                  | 27.8 (16.6, 46.6)  | 11.6 (5.2, 25.7)       | 6.1 (2.7, 13.3)        |
| Nicardipine                     | 4               | 14                  | 26.8 (12.9, 55.8)  | 11.9 (3.7, 38.9)       | 7.0 (2.3, 21.8)        |
| Tetrazepam                      | 6               | 22                  | 25.6 (14.0, 46.7)  | 5.9 (2.4, 14.6)        | 4.9 (2.0, 12.0)        |
| Bosentan                        | 85              | 353                 | 22.8 (19.4, 26.9)  | 15.0 (11.8, 19.2)      | 7.3 (5.7, 9.2)         |
| Halofantrine                    | 4               | 17                  | 22.1 (10.4, 46.8)  | 9.0 (3.0, 27.1)        | 5.3 (1.8, 15.7)        |
| Emtricitabine                   | 4               | 17                  | 22.1 (10.4, 46.8)  | 14.6 (4.6, 46.0)       | 10.3 (3.4, 30.9)       |
| Trimethobenzamide               | 4               | 18                  | 20.8 (9.8, 44.4)   | 15.7 (5.1, 48.6)       | 6.3 (2.1, 18.7)        |
| Etodolac                        | 5               | 25                  | 18.8 (9.4, 37.3)   | 15.8 (5.9, 42.5)       | 9.1 (3.4, 24.1)        |
| Voriconazole                    | 52              | 270                 | 18.2 (14.7, 22.5)  | 10.7 (7.9, 14.6)       | 6.7 (5.0, 9.1)         |
| Isoniazid/rifampicin            | 4               | 21                  | 17.9 (8.2, 38.7)   | 7.5 (2.4, 23.2)        | 8.0 (2.7, 24.1)        |
| Pioglitazone                    | 4               | 21                  | 17.9 (8.2, 38.7)   | 14.7 (4.9, 43.9)       | 6.1 (2.1, 17.9)        |
| Codeine/pseudoephedrine         | 5               | 27                  | 17.4 (8.7, 34.8)   | 6.9 (2.6, 18.2)        | 6.4 (2.5, 16.6)        |
| Dapsone                         | 9               | 49                  | 17.2 (10.3, 28.9)  | 12.9 (6.2, 27.0)       | 8.5 (4.1, 17.6)        |
| Propylthiouracil                | 14              | 79                  | 16.6 (11.0, 25.3)  | 10.9 (6.1, 19.7)       | 7.0 (3.9, 12.6)        |
| Gemtuzumab                      | 42              | 241                 | 16.4 (12.9, 20.9)  | 17.1 (12.3, 24.0)      | 6.8 (4.9, 9.4)         |
| Sevoflurane                     | 5               | 29                  | 16.2 (8.0, 32.6)   | 13.6 (5.2, 35.5)       | 4.6 (1.8, 12.0)        |
| Ursodeoxycholic acid            | 4               | 24                  | 15.6 (7.1, 34.3)   | 19.9 (6.7, 58.6)       | 7.1 (2.4, 20.6)        |
| Estradiol                       | 4               | 24                  | 15.6 (7.1, 34.3)   | 6.4 (2.1, 19.3)        | 4.8 (1.6, 14.0)        |
| Mercaptopurine                  | 41              | 252                 | 15.3 (12.0, 19.6)  | 11.4 (8.1, 16.0)       | 6.0 (4.3, 8.4)         |
| Ethinylestradiol/dienogest      | 7               | 43                  | 15.3 (8.4, 27.7)   | 3.3 (1.5, 7.3)         | 3.0 (1.4, 6.8)         |
| Basiliximab                     | 26              | 162                 | 15.1 (11.1, 20.6)  | 11.2 (7.3, 17.1)       | 3.8 (2.5, 5.8)         |
| Chlorprothixene                 | 4               | 25                  | 15.0 (6.8, 33.1)   | 5.4 (1.9, 16.0)        | 3.8 (1.3, 11.0)        |
| Dactinomycin                    | 28              | 177                 | 14.9 (11.0, 20.1)  | 16.7 (11.1, 20.3)      | 6.3 (4.2, 9.5)         |
| Tioguanine                      | 37              | 240                 | 14.5 (11.2, 18.9)  | 14.2 (9.9, 20.2)       | 6.2 (4.4, 8.8)         |
| Rifampicin                      | 37              | 243                 | 14.3 (11.0, 18.6)  | 8.4 (5.8, 12.0)        | 5.1 (3.6, 7.3)         |
| Norethisterone                  | 8               | 53                  | 14.2 (8.1, 24.9)   | 7.4 (3.4, 15.7)        | 3.5 (2.9, 4.3)         |
| Loracarbef                      | 5               | 34                  | 13.8 (6.7, 28.2)   | 9.1 (3.5, 23.9)        | 3.9 (1.5, 10.1)        |
| Aztreonam                       | 5               | 34                  | 13.8 (6.7, 28.2)   | 12.3 (4.6, 32.6)       | 6.7 (2.6, 17.3)        |
| Fusidic acid                    | 8               | 56                  | 13.4 (7.6, 23.7)   | 6.1 (2.9, 13.1)        | 3.5 (1.7, 7.4)         |
| Hydroxychloroquine              | 6               | 44                  | 12.8 (6.6, 24.7)   | 6.0 (2.5, 14.2)        | 3.9 (1.7, 9.3)         |
| Ethosuximide                    | 14              | 105                 | 12.5 (8.1, 19.3)   | 8.0 (4.5, 14.2)        | 4.3 (2.5, 7.6)         |
| Acetazolamide                   | 7               | 54                  | 12.2 (6.6, 22.5)   | 8.7 (3.9, 19.7)        | 4.2 (1.9, 9.3)         |
| Nefazodone                      | 17              | 136                 | 11.7 (7.9, 17.5)   | 6.7 (4.0, 11.2)        | 4.5 (2.7, 7.4)         |
| Levocetirizine                  | 5               | 40                  | 11.7 (5.6, 24.4)   | 4.4 (1.7, 11.3)        | 3.0 (1.2, 7.7)         |
| Minocycline                     | 117             | 959                 | 11.6 (10.0, 13.5)  | 4.3 (3.5, 5.3)         | 3.5 (2.9, 4.3)         |
| Josamycin                       | 10              | 82                  | 11.4 (6.8, 19.2)   | 5.2 (2.7, 10.1)        | 2.6 (1.3, 5.0)         |
| Enoxaparin                      | 4               | 33                  | 11.4 (5.0, 25.8)   | 5.2 (1.8, 15.4)        | 3.5 (1.2, 10.0)        |
| Paracetamol/hydrocodone         | 19              | 160                 | 11.2 (7.6, 16.3)   | 4.2 (2.6, 6.8)         | 3.9 (2.4, 6.4)         |
| Rasburicase                     | 8               | 68                  | 11.0 (6.2, 19.8)   | 5.2 (2.5, 11.0)        | 3.7 (1.8, 7.8)         |
| Ethinylestradiol/gestodene      | 6               | 54                  | 10.4 (5.3, 20.5)   | 2.3 (1.0, 5.5)         | 2.3 (1.0, 5.2)         |
| Itraconazole                    | 15              | 137                 | 10.3 (6.7, 15.8)   | 4.2 (2.5, 7.3)         | 2.8 (1.7, 4.9)         |
| Caspofungin                     | 9               | 84                  | 10.1 (5.8, 17.5)   | 4.3 (2.1, 8.6)         | 3.0 (1.5, 6.0)         |
| Zafirlukast                     | 6               | 56                  | 10.0 (5.1, 19.9)   | 6.0 (2.6, 14.1)        | 3.5 (1.5, 8.1)         |

\*Adjusted for age, gender, country of reporting and type of reporter. †Drugs withdrawn from the market due to hepatotoxicity.

**Table S2**Crude ROR for hepatic injury of individual drugs (with  $\geq 30$  cases from the main analysis) stratified by age groups

| Drug                              | Age group <3 years |                              |                             | Age group 3 to 11 years |                              |                             | Age group 12 to 17 years |                              |                             |
|-----------------------------------|--------------------|------------------------------|-----------------------------|-------------------------|------------------------------|-----------------------------|--------------------------|------------------------------|-----------------------------|
|                                   | Number of cases    | ROR With vaccines (n = 1360) | Without vaccines (n = 1104) | Number of cases         | ROR With vaccines (n = 1962) | Without vaccines (n = 1882) | Number of cases          | ROR With vaccines (n = 3273) | Without vaccines (n = 3161) |
| Isotretinoin                      | 8                  | 0.1*                         | 1.8*                        | 2                       | 2.6*                         | 1.1*                        | 410                      | 1.6                          | 1.2                         |
| Paracetamol                       | 117                | 22.6                         | 4.0                         | 74                      | 5.1                          | 2.2                         | 156                      | 4.9                          | 3.6                         |
| Valproic acid                     | 29                 | 16.8                         | 2.9                         | 99                      | 6.6                          | 2.9                         | 80                       | 2.8                          | 2.1                         |
| Carbamazepine                     | 16                 | 17.5                         | 2.0                         | 67                      | 5.6                          | 2.4                         | 57                       | 2.6                          | 1.9                         |
| Methotrexate                      | 13                 | 11.2                         | 2.0                         | 75                      | 8.5                          | 3.7                         | 46                       | 2.6                          | 1.9                         |
| Minocycline                       | -                  | -                            | -                           | 2                       | 5.6                          | 2.4*                        | 115                      | 5.7                          | 4.2                         |
| Lamotrigine                       | 5                  | 4.2                          | 0.7*                        | 50                      | 3.5                          | 1.5                         | 57                       | 1.8                          | 1.3                         |
| Zidovudine                        | 99                 | 10.4                         | 1.8                         | 7                       | 3.3                          | 1.5*                        | -                        | -                            | -                           |
| Ceftriaxone                       | 19                 | 7.2                          | 1.3*                        | 56                      | 7.3                          | 3.2                         | 29                       | 3.1                          | 2.3                         |
| Pemolinet                         | -                  | -                            | -                           | 76                      | 42.7                         | 18.7                        | 28                       | 10.7                         | 8.0                         |
| Methylphenidate                   | -                  | -                            | -                           | 51                      | 1.8                          | 0.8*                        | 45                       | 1.3                          | 0.9*                        |
| Bosentan                          | 35                 | 89.2                         | 15.7                        | 22                      | 14.7                         | 6.4                         | 28                       | 9.7                          | 7.2                         |
| Ciclosporin                       | 34                 | 31                           | 5.4                         | 23                      | 3.8                          | 1.7                         | 14                       | 1.6                          | 1.2*                        |
| Atomoxetine                       | -                  | -                            | -                           | 17                      | 1.7                          | 0.7*                        | 47                       | 2.9                          | 2.1                         |
| Azithromycin                      | 10                 | 2.8                          | 0.5*                        | 30                      | 1.9                          | 0.8*                        | 23                       | 1.3                          | 1.0*                        |
| Olanzapine                        | -                  | -                            | -                           | 5                       | 2.4                          | 1.0*                        | 57                       | 4.2                          | 3.1                         |
| Infliximab                        | -                  | -                            | -                           | 4                       | 0.8*                         | 0.3*                        | 56                       | 1.6                          | 1.2*                        |
| Erythromycin                      | 12                 | 7                            | 1.2*                        | 30                      | 4.9                          | 2.1                         | 18                       | 3.0                          | 2.3                         |
| Risperidone                       | -                  | -                            | -                           | 20                      | 2.1                          | 0.9*                        | 39                       | 1.0                          | 0.7*                        |
| Phenytol                          | 11                 | 12.1                         | 2.1                         | 18                      | 4.0                          | 1.7                         | 28                       | 2.0                          | 1.5                         |
| Voriconazole                      | 4                  | 67.5                         | 11.8                        | 19                      | 14.6                         | 6.4                         | 29                       | 9.3                          | 6.9                         |
| Topiramate                        | 11                 | 11.6                         | 2.0                         | 23                      | 3.3                          | 1.4*                        | 17                       | 1.5*                         | 1.1*                        |
| Sulfamethoxazole/trimethoprim     | 8                  | 2                            | 0.3*                        | 13                      | 0.9                          | 0.4*                        | 27                       | 1.4                          | 1.0*                        |
| Isoniazid                         | 8                  | 10.2                         | 10.7                        | 15                      | 30.0                         | 13.1                        | 24                       | 16.3                         | 12.1                        |
| Vincristine                       | 12                 | 15.7                         | 2.8                         | 21                      | 3.5                          | 1.5                         | 13                       | 1.4*                         | 1.0*                        |
| Lamivudine                        | 25                 | 10.7                         | 1.9                         | 17                      | 7.8                          | 3.4                         | 3                        | 2.6*                         | 1.9*                        |
| Ethinylestradiol/levonorelrel     | -                  | -                            | -                           | -                       | -                            | -                           | 43                       | 2.1                          | 1.6                         |
| Oxcarbazepine                     | 5                  | 10.3                         | 1.8*                        | 13                      | 2.2                          | 0.9*                        | 25                       | 2.0                          | 1.5                         |
| Fluconazole                       | 13                 | 14.6                         | 2.6                         | 7                       | 5.9                          | 2.6                         | 22                       | 9.3                          | 6.9                         |
| Gemtuzumab                        | 1                  | 4.2                          | 0.7*                        | 27                      | 16.4                         | 7.2                         | 14                       | 15.6                         | 11.6                        |
| Mercaptopurine                    | 2                  | 17.5                         | 3.1*                        | 16                      | 11.1                         | 4.8                         | 23                       | 10.6                         | 7.9                         |
| Phenobarbital                     | 11                 | 11.5                         | 2.0                         | 22                      | 8.3                          | 3.6                         | 8                        | 2.5                          | 1.8*                        |
| Amoxicillin/clavulanate potassium | 9                  | 4.8                          | 0.8*                        | 12                      | 1.8                          | 0.8*                        | 17                       | 2.7                          | 2.0                         |
| Rifampicin                        | 11                 | 43.3                         | 7.6                         | 11                      | 17.0                         | 7.4                         | 15                       | 5.2                          | 3.9                         |
| Tioguanine                        | 3                  | 34.6                         | 6.1                         | 28                      | 15.5                         | 6.8                         | 6                        | 4.6                          | 3.4                         |
| Nevirapine                        | 29                 | 5.3                          | 0.9*                        | 3                       | 1.9*                         | 0.8*                        | 5                        | 1.8*                         | 1.4*                        |
| Clozapine                         | -                  | -                            | -                           | 1                       | 1.0*                         | 0.4*                        | 35                       | 1.1                          | 0.8*                        |
| Cytarabine                        | 10                 | 15.6                         | 5.7                         | 16                      | 3.1                          | 1.4*                        | 10                       | 1.6*                         | 1.2*                        |
| Clarithromycin                    | 6                  | 7.3                          | 1.3*                        | 13                      | 2.4                          | 1.1*                        | 16                       | 1.7                          | 1.2*                        |
| Acetylsalicylic acid              | 2                  | 2.6                          | 0.5*                        | 15                      | 3.4                          | 1.5*                        | 13                       | 1.1*                         | 0.8*                        |
| Interferon beta                   | -                  | -                            | -                           | 20                      | 13.4                         | 5.9                         | 10                       | 1.5*                         | 1.1*                        |

\*Not statistically significant crude RORs. †Drugs have been ranked by number of cases. Topical drug-related records have been excluded.
